# Supplementary material for: Early phase clinical trials extension to guidelines for the content of statistical analysis plans
Source: PubMed Central journal article supplement — BMJ. 2022 Feb 7;376:e068177. doi: 10.1136/bmj-2021-068177 (PMC8819597; doi:10.1136/bmj-2021-068177), 2022-02-07
Supplement: homv068177.ww2.pdf [file homv068177.ww2.pdf]

CTU Name: \_\_\_\_\_

Details of statistics representative who completed this survey:

Name: \_\_\_\_\_

Email: \_\_\_\_\_

*We ask the above details for the purposes of keeping a record of responders and to ascertain aggregate data regarding survey completion. If you do not wish to be acknowledged for your participation, please tick here:*

Please return the completed surveys to [V.S.Homer@bham.ac.uk](mailto:V.S.Homer@bham.ac.uk).

The following questions are about Statistical Analysis Plans (SAPs) and current practice within your CTU. We would also be grateful if your responses could be made on behalf of your CTU, so it may help to discuss the survey with your colleagues before returning it.

For the purpose of this project and survey, we are defining early phase trials as trials which aim: to determine safe doses and dosing schedules for a treatment/intervention (phase I), or whether or not there is any signal of efficacy for that intervention (phase II or I/II).

Our definition therefore includes single-arm or randomised phase I trials and single-arm phase II trials such as:

- Rule-based phase I trials (such as the 3+3 design),
- Model-based phase I trials (such as the continual reassessment method),
- Model-assisted phase I trials (such as modified toxicity probability interval (mTPI) design),
- Randomised dose finding phase I trials (such as those which randomise between placebo and a dose of the experimental treatment, or those which randomise to attain the optimal doses or dose schedules once safety has been assured),
- Single arm phase II trials.

Does your trials unit run early phase clinical trials?

Yes

No

If you answered no to the above question, we would appreciate it if you could return the survey with only this question answered using the details provided at the start. We would like to thank you for your time in reviewing our request and shall no longer contact you in relation to this project.

If your unit does run early phase clinical trials, we would greatly appreciate it if you could complete the remainder of this survey.

1. Regardless of trial phase, does your trials unit have a SAP template, or a specific set of instructions, that you use when authoring SAPs?

Yes

No

1a. If no, reason why? Please tick one:

Template is not required

Please specify why \_\_\_\_\_

Template under development

Need for template recognised but development has not started

Other (please specify) \_\_\_\_\_



6. Do you think there is a requirement for early phase SAP guidance?

Yes

No

7. If such guidance existed, is this something you feel you would use at your CTU?

Yes

No

As part of this project, we will be producing guidelines, piloting them and holding consensus meetings. If your CTU would be happy to be involved with this project and be contacted in collaboration with it, please nominate a contact and provide their details below.

Name \_\_\_\_\_

Email \_\_\_\_\_

If you have any additional comment about SAPs for early phase trials, please use the space provided.

We would like to thank you for the time taken in considering our request and completing this survey. The opinions and views of your CTU are important for this project, and we are grateful for your support.
